# Supplementary material for: First-principles investigation of two-dimensional covalent–organic framework electrocatalysts for oxygen evolution/reduction and hydrogen evolution reactions
Source: Royal Society of Chemistry journal article supplement (doi:10.1039/d1se01257f), 2021-01-01
Supplement: d1se01257f1.pdf [file d1se01257f1.pdf]

*Electronic supplementary information*

**First-Principles Investigation of Two-Dimensional Covalent Organic  
Frameworks Electrocatalysts for Oxygen Evolution/Reduction and  
Hydrogen Evolution Reactions<sup>†</sup>**

Jing Ji,<sup>a</sup> Cunjin Zhang,<sup>a</sup> Shuaibo Qin,<sup>a</sup> and Peng Jin<sup>\*ab</sup>

<sup>a</sup>School of Materials Science and Engineering, Hebei University of Technology, Tianjin 300130, China. *E-mail*: china.peng.jin@gmail.com

<sup>b</sup>Key Laboratory of Special Functional Materials for Ecological Environment and Information (Hebei University of Technology), Ministry of Education, Tianjin 300130, China.

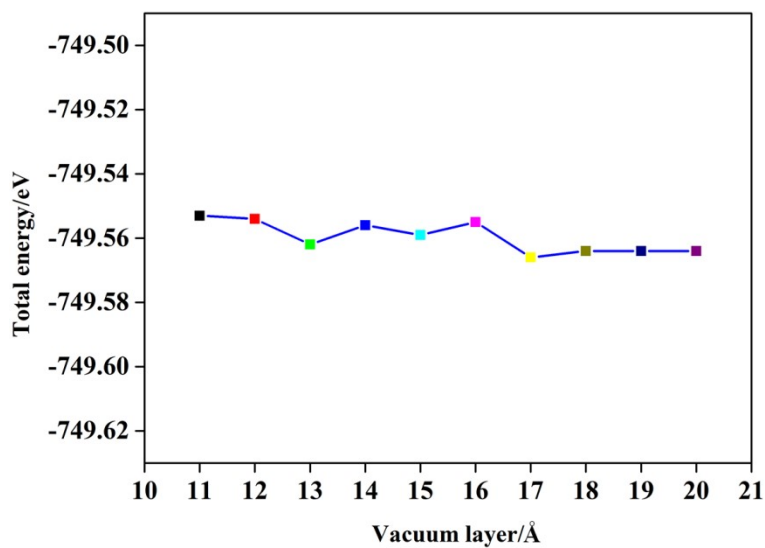

**Fig. S1** Calculated total energies of Co-COF as a function of the thickness of vacuum layer (11-20 Å). According to the small energy change ( $< 0.013$  eV), a 15 Å vacuum layer is large enough for current study.

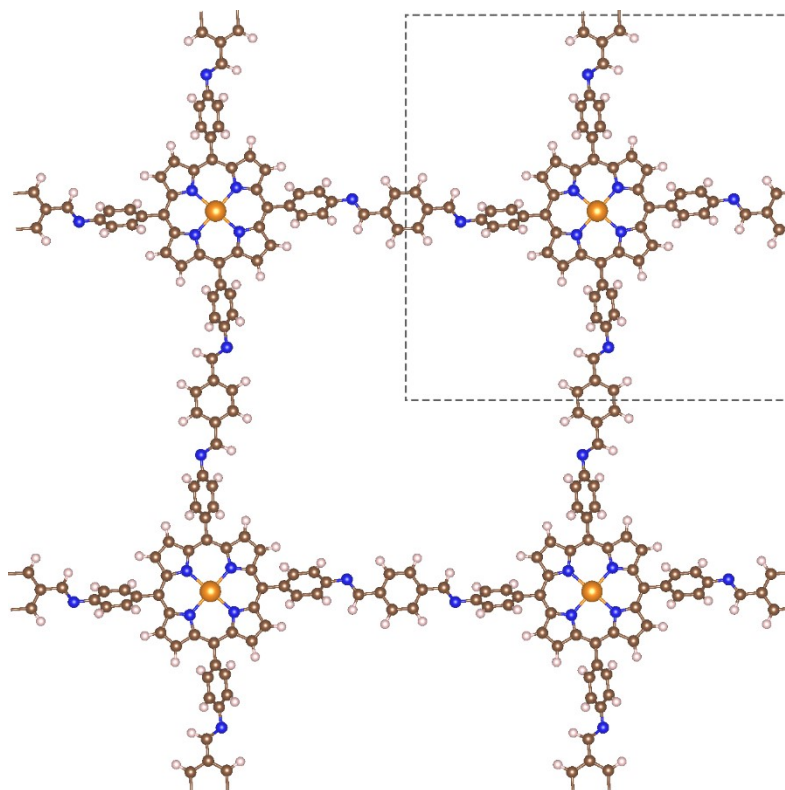

**Fig. S2** Unit cell (highlighted by the dashed line) used in the calculations of M-COFs (8 N atoms, 60 C atoms, 36 H atoms, and 1 metal atom). C: brown; N: blue; H: white; M: golden.

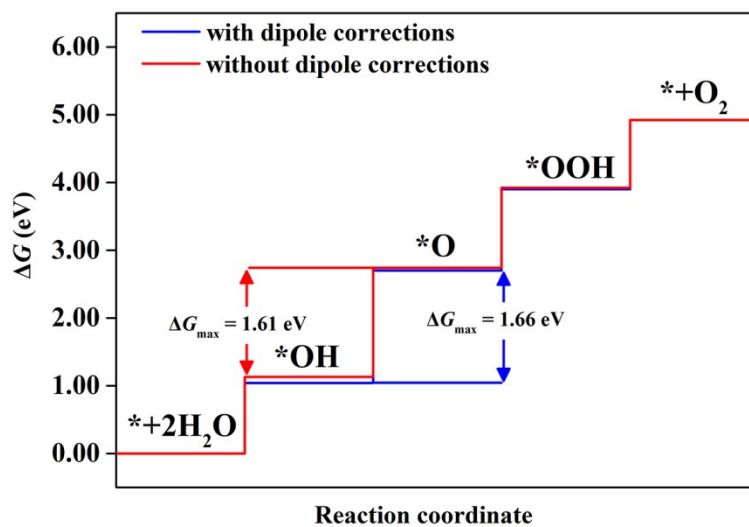

**Fig. S3** Gibbs free energy diagrams for the OER on Co-COF with and without dipole corrections. According to the small effect, the corrections were not considered in the current work.

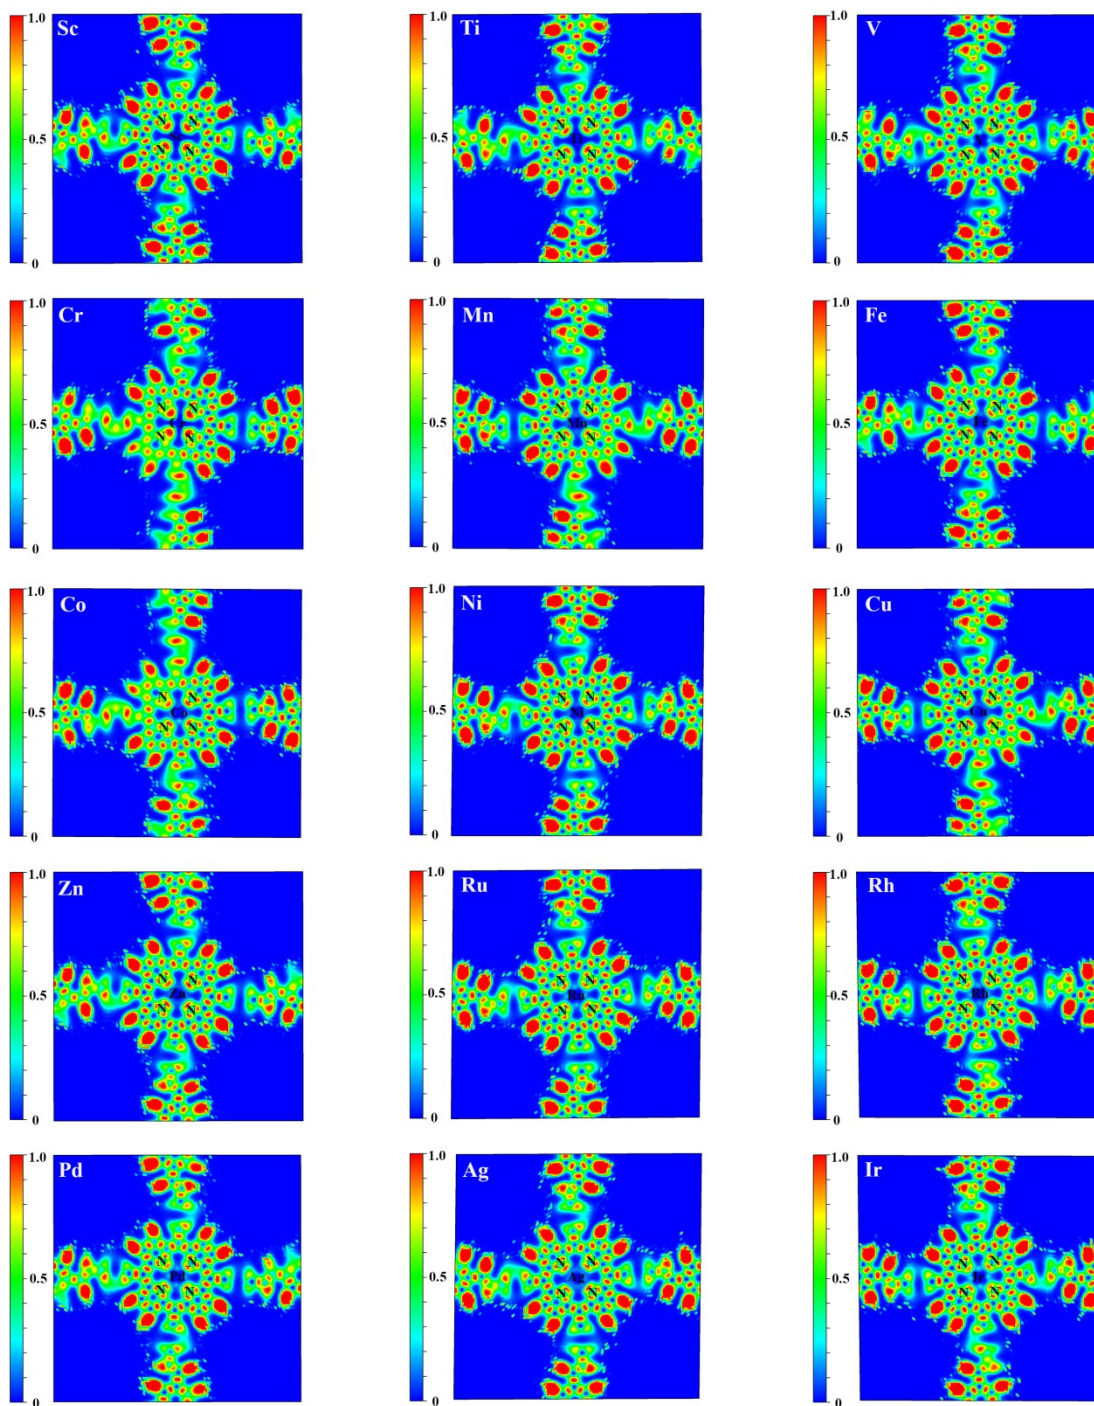

**Fig. S4** Electron localization functions (ELFs) for the metalloporphyrin planes of all the M-COFs.

**Table S1** Standard dissolution potentials ( $U_{\text{diss}}^0$ )<sup>S1</sup> of metal atoms, number of transferred electrons ( $n$ ) during the dissolution, formation energies ( $E_{\text{f-M}}$ , eV) and calculated dissolution potentials ( $U_{\text{diss}}$ , V vs. SHE) of the metals in M-COFs.

| Metal | $U_{\text{diss}}^0$ | $n$ | $E_{\text{f-M}}$ | $U_{\text{diss}}$ | Metal | $U_{\text{diss}}^0$ | $n$ | $E_{\text{f-M}}$ | $U_{\text{diss}}$ |
|-------|---------------------|-----|------------------|-------------------|-------|---------------------|-----|------------------|-------------------|
| Sc    | -2.08               | 3   | -8.32            | 0.69              | Cu    | 0.34                | 2   | -3.90            | 2.29              |
| Ti    | -1.63               | 2   | -6.03            | 1.38              | Zn    | -0.76               | 2   | -5.41            | 1.95              |
| V     | -1.18               | 2   | -5.88            | 1.76              | Ru    | 0.46                | 2   | -3.30            | 2.11              |
| Cr    | -0.91               | 2   | -6.01            | 2.10              | Rh    | 0.60                | 2   | -5.46            | 3.33              |
| Mn    | -1.19               | 2   | -5.46            | 1.54              | Pd    | 0.95                | 2   | -4.92            | 3.41              |
| Fe    | -0.45               | 2   | -4.81            | 1.95              | Ag    | 0.80                | 1   | -4.27            | 5.07              |
| Co    | -0.28               | 2   | -4.77            | 2.11              | Ir    | 1.16                | 2   | -4.85            | 3.58              |
| Ni    | -0.26               | 2   | -4.96            | 2.22              |       |                     |     |                  |                   |

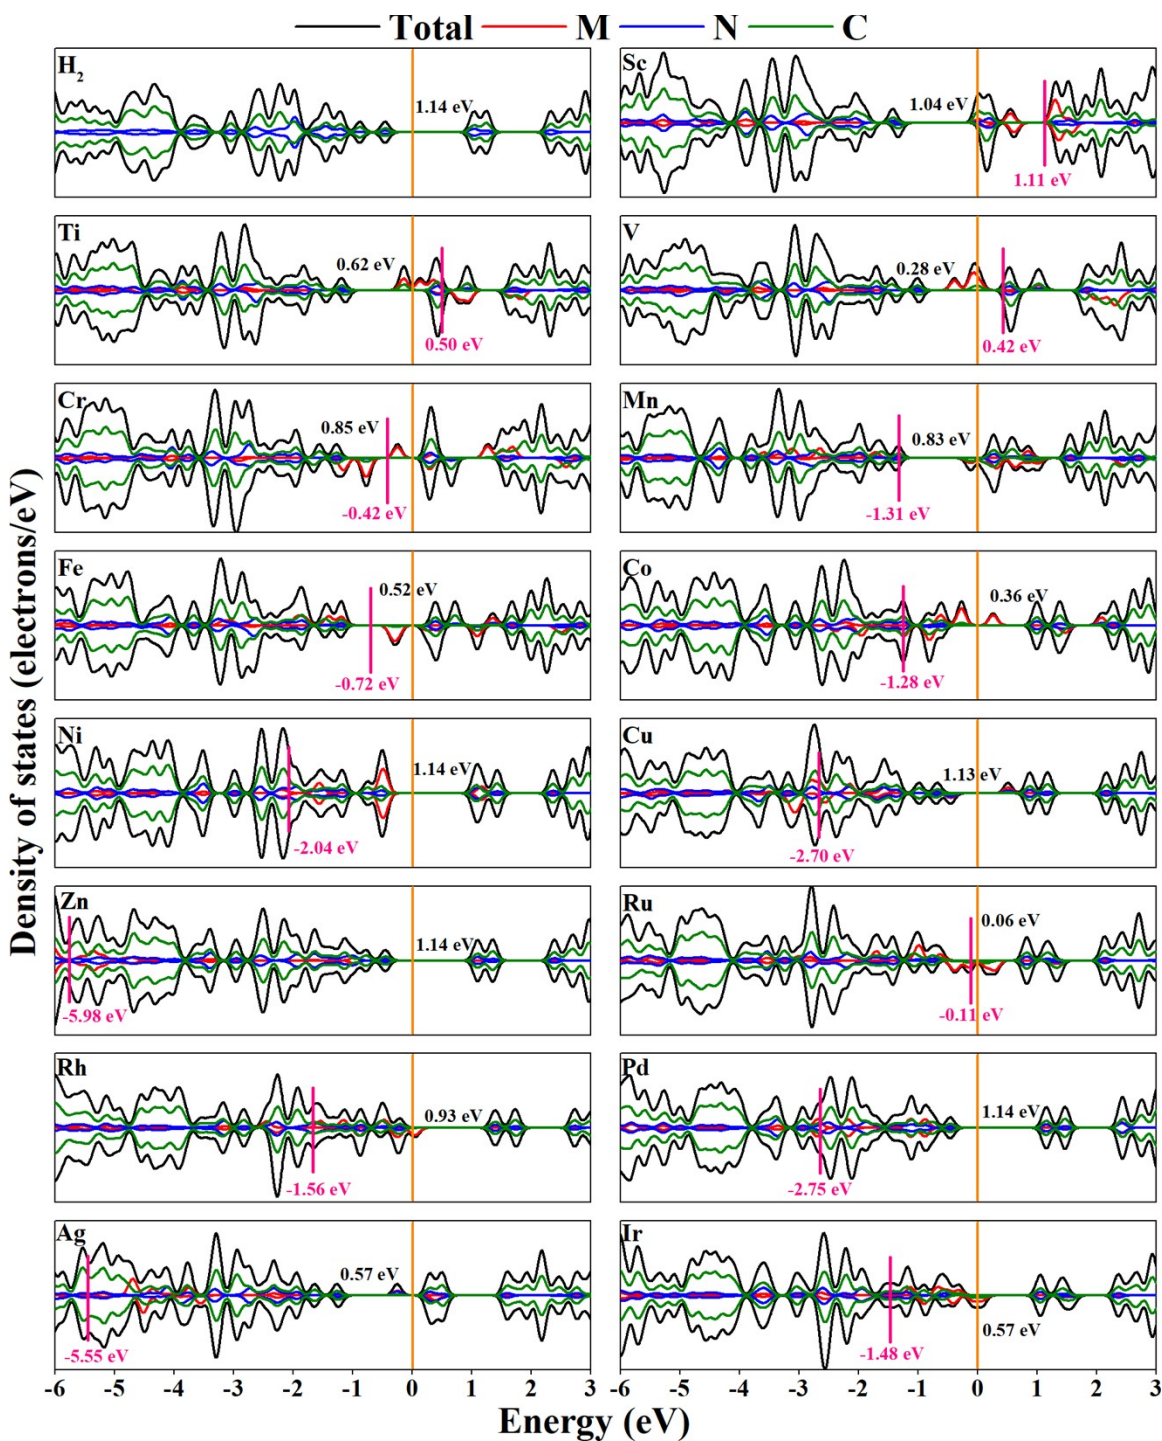

**Fig. S5** Total and projected DOSs of M-COFs with band gap energies (black) and *d*-band centers of the metals (rose). Orange line denotes the Fermi level. Both spin up (top) and spin down (bottom) states are shown.



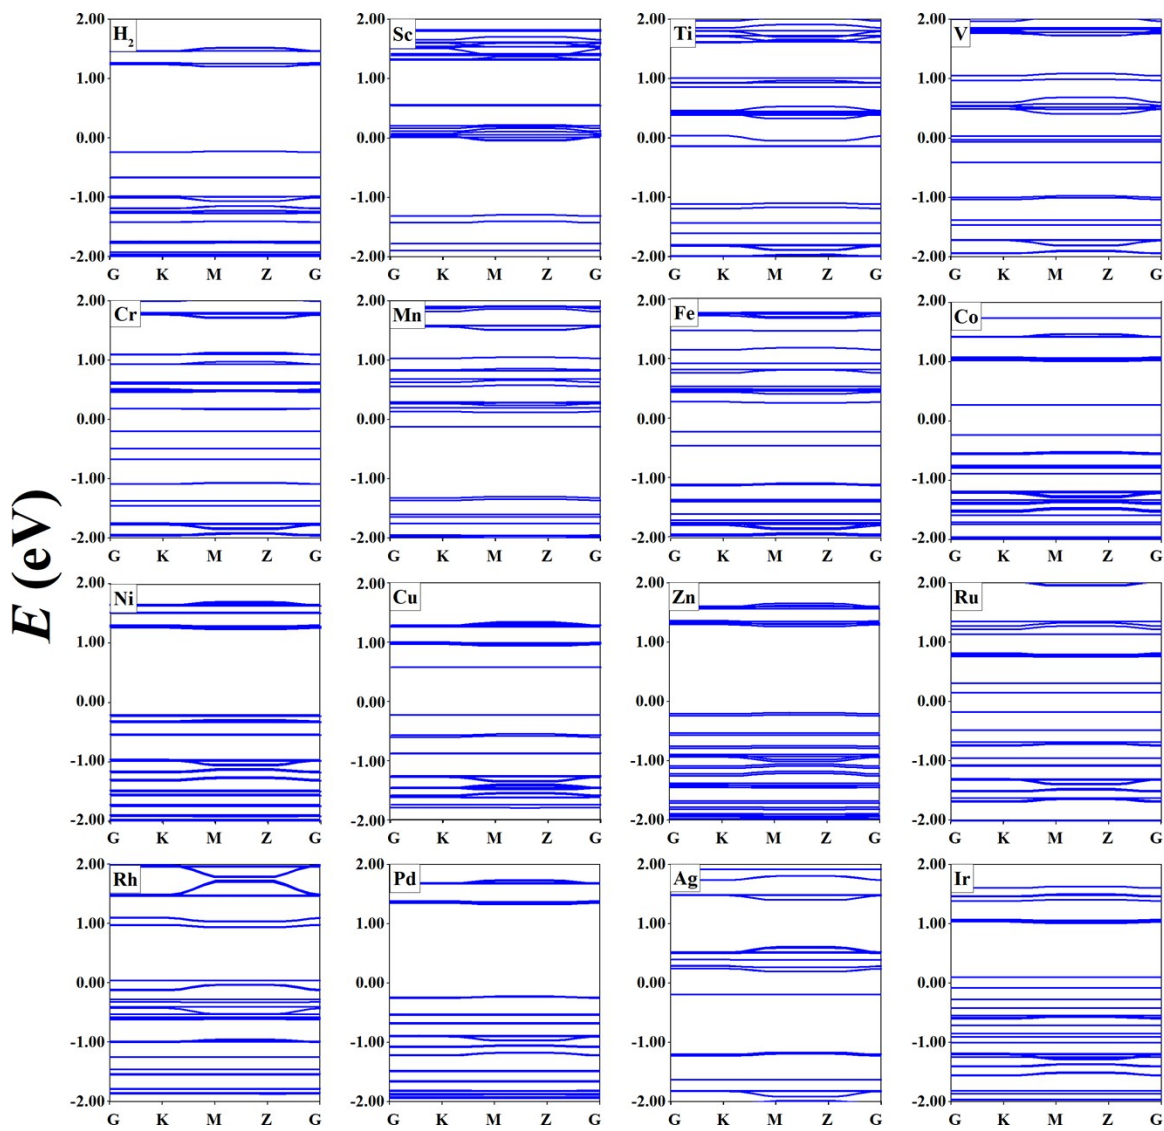

**Fig. S6** Electronic band structures of M-COFs.

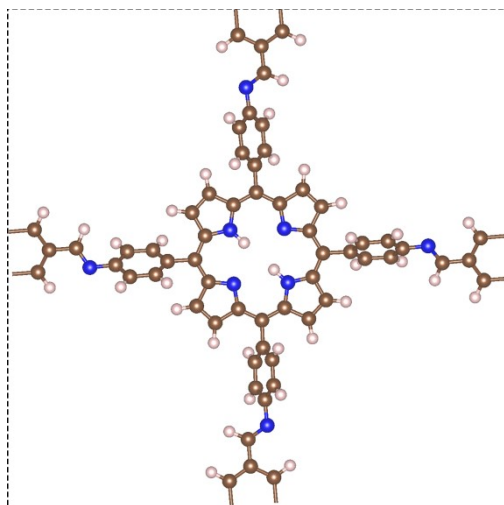

**Fig. S7** Unit cell of the metal-free H<sub>2</sub>-COFs.



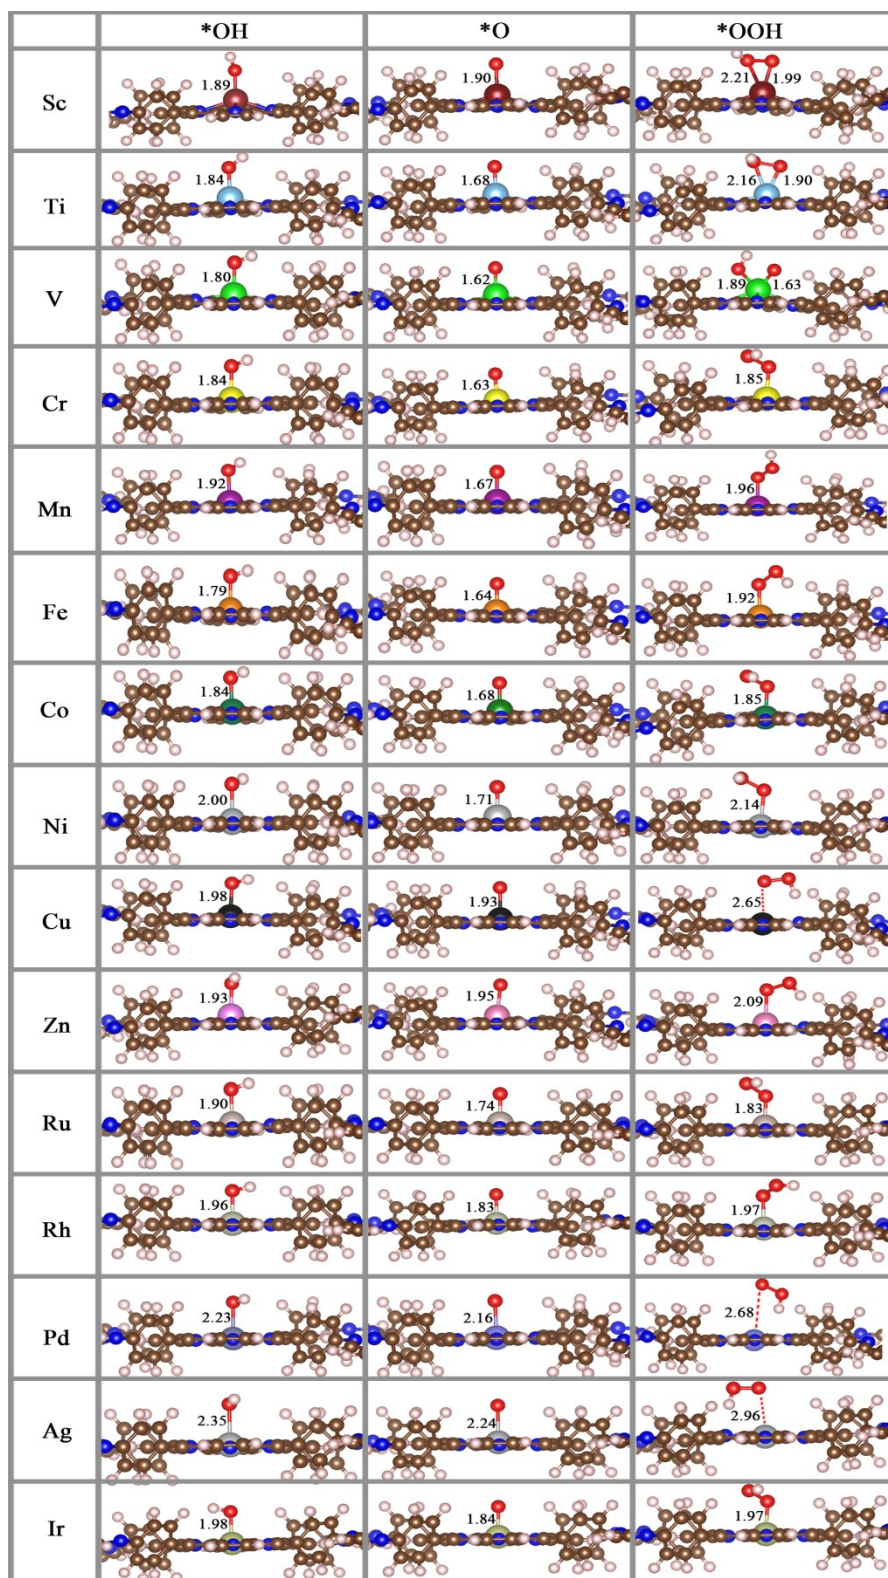

**Fig. S8** Optimized structures of all key intermediate species involved in the OER/ORR process on the M-COFs. The distances are given in Å.

**Table S2** Adsorption free energies of various reaction species on the M-COFs (unit: eV) and OER and ORR overpotentials (V).

| metal | $\Delta G^*_{\text{OH}}$ | $\Delta G^*_{\text{O}}$ | $\Delta G^*_{\text{OOH}}$ | $\eta^{\text{OER}}$ | $\eta^{\text{ORR}}$ |
|-------|--------------------------|-------------------------|---------------------------|---------------------|---------------------|
| Sc    | -1.85                    | -1.94                   | 1.03                      | 2.66                | 3.08                |
| Ti    | -0.75                    | -0.62                   | 1.02                      | 2.67                | 1.98                |
| V     | -0.49                    | -0.06                   | 1.65                      | 2.04                | 1.72                |
| Cr    | 0.03                     | 2.02                    | 3.03                      | 0.76                | 1.20                |
| Mn    | 1.09                     | 2.34                    | 4.19                      | 0.62                | 0.50                |
| Fe    | 1.08                     | 2.28                    | 4.08                      | 0.57                | 0.39                |
| Co    | 1.13                     | 2.74                    | 3.92                      | 0.38                | 0.23                |
| Ni    | 1.59                     | 2.80                    | 4.73                      | 0.70                | 1.04                |
| Cu    | 2.02                     | 3.01                    | 5.60                      | 1.36                | 1.91                |
| Zn    | 2.11                     | 3.11                    | 5.39                      | 1.05                | 1.70                |
| Ru    | -0.35                    | 0.49                    | 2.86                      | 1.14                | 1.58                |
| Rh    | 0.42                     | 2.16                    | 3.52                      | 0.51                | 0.81                |
| Pd    | 2.08                     | 2.81                    | 5.30                      | 1.26                | 1.61                |
| Ag    | 1.81                     | 2.71                    | 5.01                      | 1.07                | 1.32                |
| Ir    | 0.61                     | 2.18                    | 3.56                      | 0.34                | 0.62                |

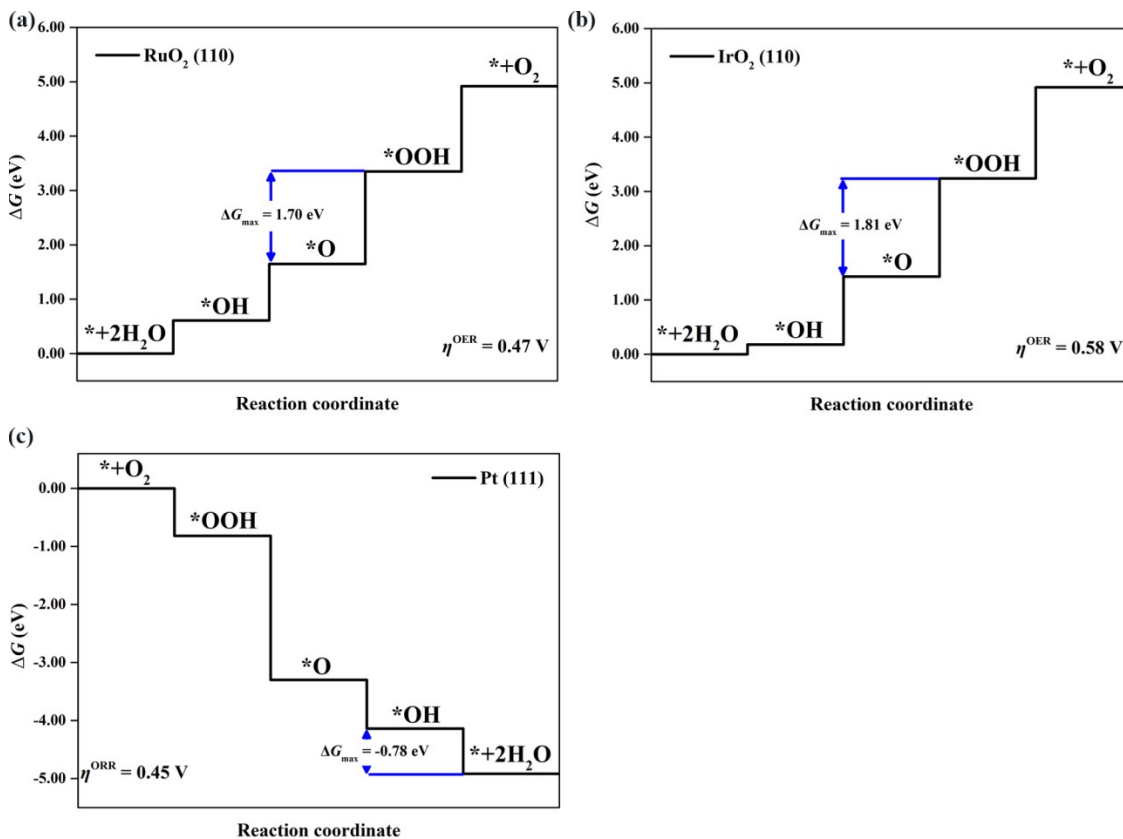

**Fig. S9** Gibbs free energy diagrams for the (a) OER on RuO<sub>2</sub> (110) and (b) IrO<sub>2</sub> (110) as well as (c) ORR on Pt (111).

#### Computational Details:

Periodic slab models of the RuO<sub>2</sub>(110) and IrO<sub>2</sub>(110) surfaces were constructed by using  $2 \times 4$  surface supercells with three metal oxide layers separated by at least 10 Å of vacuum layer. Periodic slab model of the Pt(111) was constructed using  $4 \times 4$  surface supercells with five metal layers separated by at least 10 Å of vacuum layer. The lattice parameters of RuO<sub>2</sub>(110), IrO<sub>2</sub>(110) and Pt(111) are ( $a = 12.56$  Å,  $b = 12.85$  Å,  $c = 23.14$  Å), ( $a = 12.75$  Å,  $b = 12.86$  Å,  $c = 22.46$  Å) and ( $a = 12.56$  Å,  $b = 11.16$  Å,  $c = 24.06$  Å), respectively. The k-points of  $2 \times 2 \times 1$  was generated by using the Monkhorst-Pack method. The other calculation settings are the same as those for the M-COFs as described in the main text.

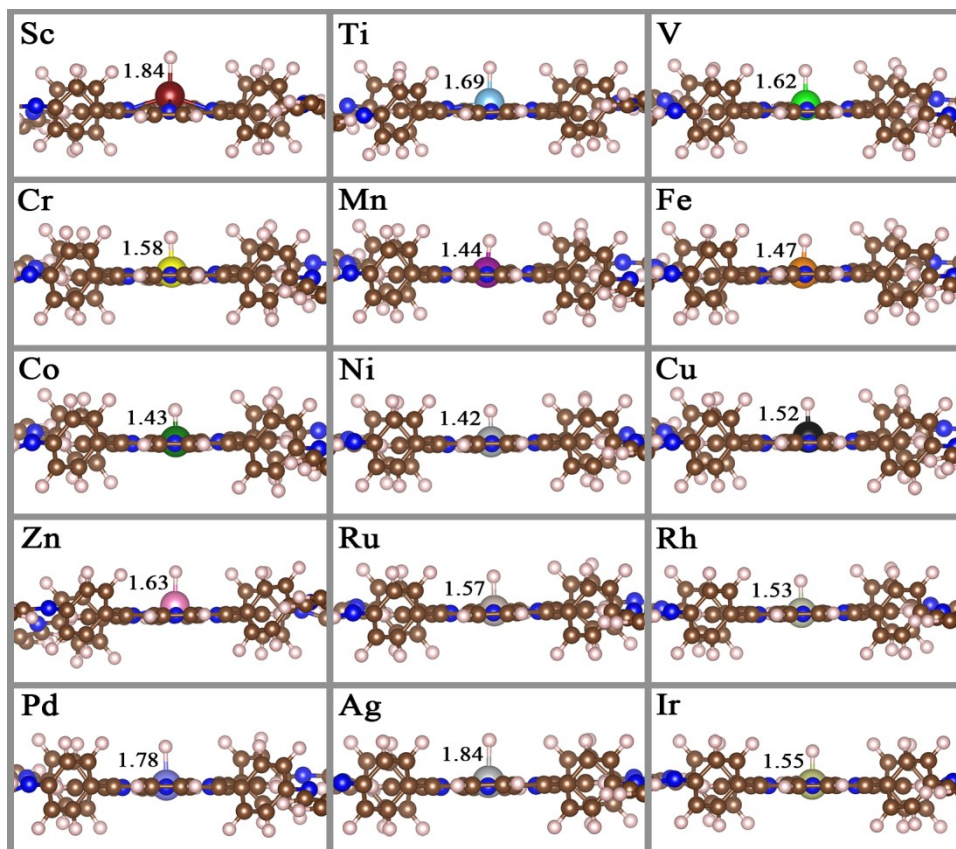

**Fig. S10** Optimized structures of \*H intermediates for the HER on the M-COFs. The distances are given in Å.

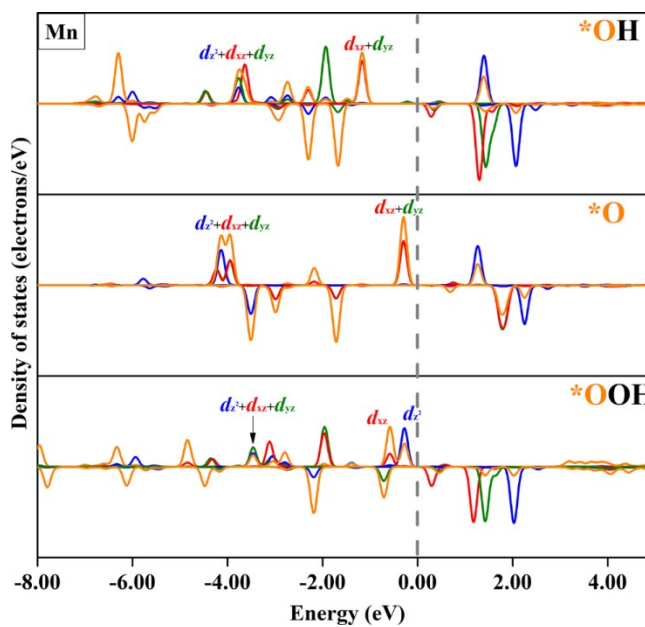

**Fig. S11** PDOSs of axial Mn-3d states and O-2p states for the OER/ORR intermediates

on Mn-COF (the predominated  $d$  state is marked if applicable). Both spin up (top) and spin down (bottom) states are shown.

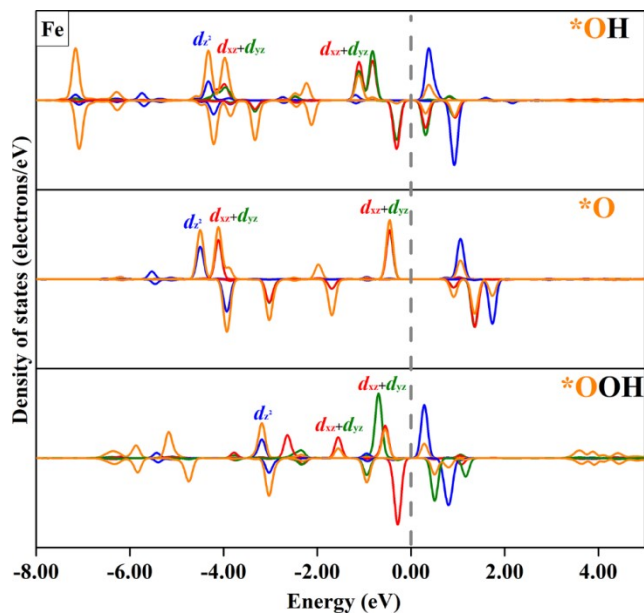

**Fig. S12** PDOSs of axial Fe-3d states and O-2p states for the OER/ORR intermediates on Fe-COF (the predominated  $d$  state is marked if applicable). Both spin up (top) and spin down (bottom) states are shown.

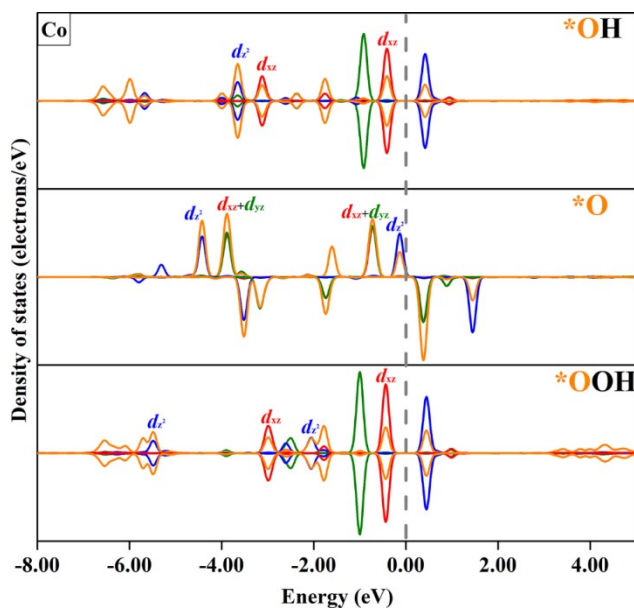

**Fig. S13** PDOSs of axial Co-3d states and O-2p states for the OER/ORR intermediates on Co-COF (the predominated  $d$  state is marked if applicable). Both spin up (top) and spin down (bottom) states are shown.



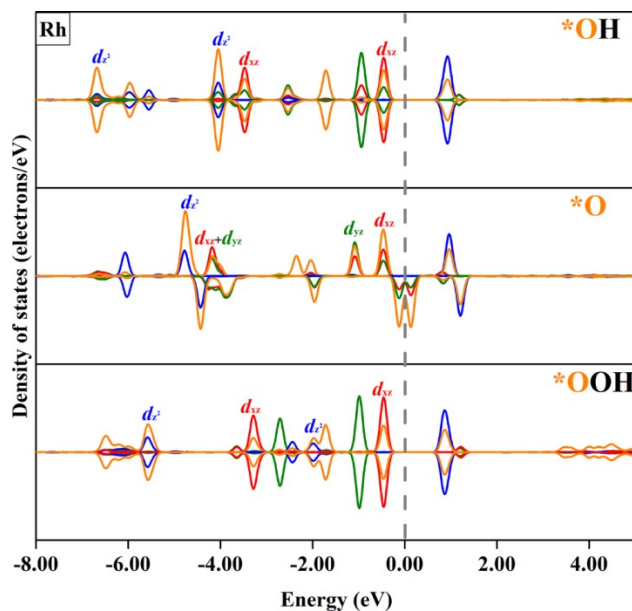

**Fig. S14** PDOSs of axial Rh-4*d* states and O-2*p* states for the OER/ORR intermediates on Rh-COF (the predominated *d* state is marked if applicable). Both spin up (top) and spin down (bottom) states are shown.

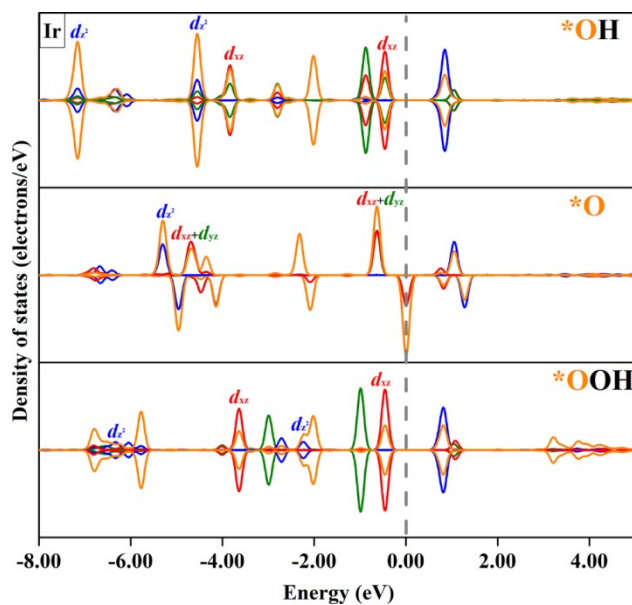

**Fig. S15** PDOSs of axial Ir-5*d* states and O-2*p* states for the OER/ORR intermediates on Ir-COF (the predominated *d* state is marked if applicable). Both spin up (top) and spin down (bottom) states are shown.

## References

S1 X. Guo, J. Gu, S. Lin, S. Zhang, Z. Chen, S. Huang, *J. Am. Chem. Soc.*, 2020, **142**,  
5709-5721.
